# Supplementary material for: Systems Biology of Tissue-Specific Response to Anaplasma phagocytophilum Reveals Differentiated Apoptosis in the Tick Vector Ixodes scapularis
Source: PubMed Central journal article supplement (PMC4376793; doi:10.1371/journal.pgen.1005120), 2015-03-27
Supplement: pgen.1005120.s007.pdf [file pgen.1005120.s007.pdf]

Table S1. RNAseq statistics.

| Samples          | No. read pairs<br>(Sample 1 & 2) | Raw Data (Gbp)<br>(Sample 1 & 2) | No. contigs<br>(Sample 1 & 2) |
|------------------|----------------------------------|----------------------------------|-------------------------------|
| <hr/>            |                                  |                                  |                               |
| Salivary glands  |                                  |                                  |                               |
| from infected    | 13,957,587                       | 2.9                              | 10,308                        |
| adult female     | 14,133,013                       | 2.9                              | 10,307                        |
| ticks            |                                  |                                  |                               |
| <hr/>            |                                  |                                  |                               |
| Salivary glands  |                                  |                                  |                               |
| from uninfected  | 14,088,073                       | 2.9                              | 8,702                         |
| adult female     | 12,987,915                       | 2.7                              | 8,702                         |
| ticks            |                                  |                                  |                               |
| <hr/>            |                                  |                                  |                               |
| Midguts from     |                                  |                                  |                               |
| infected adult   | 15,103,377                       | 3.1                              | 10,964                        |
| female ticks     | 14,633,730                       | 3.0                              | 10,962                        |
| <hr/>            |                                  |                                  |                               |
| Midguts from     |                                  |                                  |                               |
| uninfected adult | 10,842,475                       | 2.2                              | 11,437                        |
| female ticks     | 11,045,326                       | 2.2                              | 11,437                        |
| <hr/>            |                                  |                                  |                               |
| Infected         | 10,457,230                       | 2.1                              | 12,950                        |
| nymphs           | 11,122,072                       | 2.2                              | 12,953                        |
| <hr/>            |                                  |                                  |                               |
| Uninfected       | 19,943,130                       | 4.1                              | 15,560                        |
| nymphs           | 18,856,067                       | 3.8                              | 15,556                        |
| <hr/>            |                                  |                                  |                               |
