# Supplementary material for: Systems Biology of Tissue-Specific Response to Anaplasma phagocytophilum Reveals Differentiated Apoptosis in the Tick Vector Ixodes scapularis
Source: PubMed Central journal article supplement (PMC4376793; doi:10.1371/journal.pgen.1005120), 2015-03-27
Supplement: pgen.1005120.s010.pdf [file pgen.1005120.s010.pdf]

Table S4. Differential expression/representation of putative apoptosis pathway genes/proteins.

| Description                                                      | GenBank<br>(Uniprot)<br>accession Nos. | Differential gene expression/protein<br>representation<br>(Infected/Uninfected Log2-fold; P<0.05) |                    |         |
|------------------------------------------------------------------|----------------------------------------|---------------------------------------------------------------------------------------------------|--------------------|---------|
|                                                                  |                                        | Midguts                                                                                           | Salivary<br>glands | Nymphs  |
| <b>Intrinsic pathway</b>                                         |                                        |                                                                                                   |                    |         |
| Voltage-dependent anion-selective channel or mitochondrial porin | ISCW000781<br>(B7P5X8)                 | +0.3/NS                                                                                           | -0.5/NS            | NS/NS   |
| Hexokinase                                                       | ISCW012387<br>(B7QB25)                 | NS/NS                                                                                             | NS/NS              | -0.6/NF |
| B-cell CLL/lymphoma 2<br>protein Bcl-2                           | ISCW019088<br>(B7PQ11)                 | NF/NF                                                                                             | NS/NF              | NS/NF   |
|                                                                  | ISCW021516<br>(B7Q4U7)                 | NS/NF                                                                                             | NS/NS              | -3.7/NF |
| Bcl-2-associated<br>transcription factor BTF                     | ISCW003256<br>(B7PCD8)                 | -2.1/NF                                                                                           | NS/NF              | +2.6/NF |
| Bcl-2 interacting protein                                        | ISCW008101<br>(B7PTH9)                 | +1.3/NS                                                                                           | NF/NS              | NF/NF   |
|                                                                  | ISCW003136<br>(B7PDJ3)                 | +1.9/NF                                                                                           | NF/NF              | NS/NF   |
|                                                                  | ISCW015499<br>(B7QP11)                 | -1.9/NF                                                                                           | NS/NF              | +0.4/NF |
| Apoptosis inhibitor IAP                                          | ISCW010694<br>(B7Q7F6)                 | NS/NF                                                                                             | NS/NF              | -3.7/NF |
|                                                                  | ISCW014060<br>(B7QLC6)                 | NS/NF                                                                                             | NS/NF              | +2.0/NF |
|                                                                  | ISCW002567<br>(B7P7P7)                 | NF/NS                                                                                             | NF/NS              | NF/NF   |
| Cytochrome c                                                     | ISCW008740<br>(B7Q2Y4,<br>Q4PM75)      | +0.8/NS                                                                                           | -0.4/NS            | +0.3/NF |
|                                                                  | ISCW000014<br>(B7P1U9)                 | -0.9/NF                                                                                           | NS/NF              | +0.7/NF |
| Smac/DIABLO                                                      | ISCW000886<br>(B7P5Y4)                 | -1.9/NF                                                                                           | NS/NS              | +3.3/NF |
| HtrA2/Omi serine protease                                        | ISCW020167<br>(B7PZV8)                 | NS/NF                                                                                             | NS/NS              | -0.9/NF |
| Caspases                                                         | ISCW015329<br>(B7QNZ9)                 | NS/NS                                                                                             | NF/NS              | +0.6/NF |
|                                                                  | ISCW022545<br>(B7QAN7)                 | NS/NF                                                                                             | NS/NF              | -1.6/NF |
|                                                                  | ISCW013172<br>(B7QF31)                 | NS/NS                                                                                             | NS/NS              | -2.5/NF |
| Caspase-2                                                        | ISCW003039<br>(B7PDI2)                 | -1.7/NS                                                                                           | -4.8/-2.4          | +1.2/NF |
|                                                                  | ISCW014750<br>(B7QHN6)                 | NS/NS                                                                                             | NF/NS              | -2.9/NF |

---

**Extrinsic pathway**

|                                   |                           |                     |         |         |         |
|-----------------------------------|---------------------------|---------------------|---------|---------|---------|
| Fas apoptotic inhibitory molecule | ISCW011757 (B7Q584)       | -1.5/NF             | NS/NF   | -2.7/NF |         |
|                                   | ISCW000257 (B7P631)       | +4.5/-1.7           | NF/-1.8 | -4.3/NF |         |
|                                   | ISCW009053 (B7PYN9)       | +5.6/NS             | NS/-1.7 | -3.9/NS |         |
|                                   | ISCW010397 (B7Q724)       | NS/NF               | NF/-1.8 | -5.3/NF |         |
|                                   | ISCW010398 (B7Q725)       | NS/NF               | NF/NF   | -3.8/NF |         |
|                                   | ISCW010399 (B7Q726)       | NS/NF               | NF/NF   | -4.6/NF |         |
|                                   | ISCW014349 (B7QKF5)       | NS/NF               | NF/NF   | NS/NF   |         |
|                                   | ISCW014350 (B7QKF6)       | NS/NF               | NF/NF   | NF/NF   |         |
|                                   | ISCW001913 (B7PCH5)       | NF/NF               | NF/NF   | -3.5/NF |         |
|                                   | ISCW014347 (B7QKF3)       | NF/NF               | NF/NF   | -3.3/NF |         |
|                                   | ISCW014535 (B7QGS8)       | NF/NF               | NF/NF   | -3.1/NF |         |
|                                   | ISCW018177 (B7PEX3)       | NF/NF               | NF/NF   | -2.6/NF |         |
|                                   | Fatty acid synthase (FAS) | ISCW004392 (B7PK76) | NF/NS   | NF/NF   | NS/NF   |
|                                   |                           | ISCW001073 (B7P2U7) | NF/NF   | NF/NF   | NS/NF   |
|                                   |                           | ISCW014149 (B7QL04) | NF/NF   | NF/-1.8 | NS/NF   |
|                                   |                           | ISCW018176 (B7PEX2) | NF/NF   | NF/NF   | NS/NF   |
|                                   |                           | ISCW024925 (B7QJQ3) | NF/NF   | NF/NF   | -4.6/NF |
| ISCW009844 (B7Q3T1)               |                           | NF/NF               | NF/NF   | -5.3/NF |         |
| ISCW008122 (B7PVK8)               |                           | NF/NF               | NF/NF   | -4.8/NF |         |
| ISCW014534 (B7QGS7)               |                           | NF/NF               | NF/NF   | -3.4/NF |         |
| ISCW001566 (B7P4V0)               |                           | NF/NF               | NF/NF   | NS/NF   |         |
| ISCW005148 (B7PFR3)               |                           | NF/NF               | NF/NF   | NS/NF   |         |
| ISCW010394 (B7Q6N6)               |                           | NF/NF               | NF/NF   | NS/NF   |         |
| ISCW011309 (B7Q6F3)               | NF/NF                     | NF/NF               | NS/NF   |         |         |
| ISCW011310 (B7Q6F4)               | NF/NS                     | NF/NF               | NS/NF   |         |         |

---

|                                                                      |                        |         |         |         |
|----------------------------------------------------------------------|------------------------|---------|---------|---------|
| Death receptor                                                       | ISCW015148<br>(B7QNG9) | NS/NF   | NS/NF   | NS/NF   |
|                                                                      | ISCW006321<br>(B7PMY2) | NS/NF   | NS/NF   | -1.8/NF |
| <b>Perforin/Granzyme pathway</b>                                     |                        |         |         |         |
| Granzyme                                                             | ISCW001322<br>(B7P540) | NS/NF   | NF/NF   | -1.3/NF |
|                                                                      | ISCW013112<br>(B7QDI9) | NF/NF   | NF/NF   | -2.1/NF |
|                                                                      | ISCW003779<br>(B7PHH4) | NF/NF   | NF/NF   | NF/NF   |
|                                                                      | ISCW000320<br>(B7P0L5) | NF/NF   | NF/NF   | -2.8/NF |
|                                                                      | ISCW010999<br>(B7Q921) | NF/NS   | NF/NF   | NF/NF   |
|                                                                      | ISCW011206<br>(B7Q613) | NF/NF   | NF/NF   | NF/NF   |
|                                                                      | ISCW011961<br>(B7QB06) | NF/NF   | NF/NF   | NF/NF   |
| <b>Execution pathway</b>                                             |                        |         |         |         |
| Caspase-3                                                            | ISCW001741<br>(B7P6Y4) | NS/NF   | NS/NS   | +1.2/NF |
|                                                                      | ISCW019519<br>(B7PWC4) | NS/NS   | NS/NS   | -1.2/NF |
| poly ADP-ribose<br>polymerase, PARP                                  | ISCW017128<br>(B7PA88) | -1.3/NF | +0.7/NF | +1.6/NF |
|                                                                      | ISCW019970<br>(B7PV22) | NS/NS   | NS/NS   | -2.9/NF |
| Alpha fodrin, spectrin<br>alpha chain                                | ISCW000012<br>(B7P1U8) | +1.0/NS | +0.9/NS | -1.2/NS |
| Caspase-activated DNase,<br>CAD                                      | ISCW018943<br>(B7PNY7) | NS/NF   | NS/NF   | NS/NF   |
| Inhibitor of CAD, ICAD                                               | ISCW017650<br>(B7PJN6) | NS/NF   | +3.1/NF | NS/NF   |
| <b>Other apoptosis-related genes</b>                                 |                        |         |         |         |
| Apoptosis-promoting<br>RNA-binding protein TIA-<br>1/TIAR            | ISCW014211<br>(B7QI53) | +1.2/NS | +1.1/NS | +1.4/NS |
| Programmed cell death<br>protein                                     | ISCW006407<br>(B7PMJ5) | -0.7/NS | NS/NS   | +1.3/NF |
|                                                                      | ISCW016513<br>(B7P6D3) | -0.9/NF | NS/NF   | +0.8/NF |
| Bax-mediated apoptosis<br>inhibitor TEGT/BI-1                        | ISCW018655<br>(B7PL49) | -0.7/NF | NS/NF   | -0.7/NF |
| Hypothetical protein<br>(mitochondrial ribosomal<br>S23/S29 protein) | ISCW005445<br>(B7PNA5) | +1.4/NF | NS/NS   | NS/NF   |

|                                                        |                                   |         |         |         |
|--------------------------------------------------------|-----------------------------------|---------|---------|---------|
| Ccar1                                                  | ISCW023286<br>(B7QIS5)            | +2.6/NS | +1.4/NF | -0.8/NF |
| Apoptosis inducing factor                              | ISCW005256<br>(B7PLJ8)            | +2.6/NF | NS/NS   | NS/NF   |
| Apoptosis associated protein with THAP domain          | ISCW021993<br>(B7QFZ9)            | -1.3/NF | +1.2/NF | NS/NF   |
| Cellular tumor antigen P53                             | ISCW012889<br>(B7QF52)            | -1.3/NF | NS/NF   | +0.8/NF |
| Anamorsin homolog                                      | ISCW019144<br>(B7PP17)            | -2.0/NS | -1.0/NS | NS/NF   |
| TP53-regulated inhibitor of apoptosis                  | ISCW006194<br>(B7PKG1)            | -2.3/NF | -0.9/NF | +1.1/NF |
| Cell death regulator Aven                              | ISCW018605<br>(B7PKZ4)            | -2.5/NF | NS/NF   | +1.7/NF |
|                                                        | ISCW018605<br>(B7PKZ4)            | -2.5/NF | NS/NF   | +1.7/NF |
| Hypothetical protein                                   | ISCW011866<br>(B7QE72)            | -2.9/NF | +1.1/NF | NS/NF   |
| Defender against cell death                            | ISCW024010<br>(B7P488,<br>Q4PM70) | +0.8/NF | -1.2/NS | -1.5/NF |
| NADH:ubiquinone oxidoreductase, B16.6                  | ISCW005224<br>(B7PFN5)            | +1.0/NS | NS/NS   | -1.2/NF |
| Death-associated protein kinase DAPK                   | ISCW005225<br>(B7PFN6)            | +3.4/NF | NS/NS   | NS/NF   |
|                                                        | ISCW020324<br>(B7PZW2)            | NS/NF   | +2.5/NF | +0.6/NF |
| Ataxin-10                                              | ISCW022385<br>(B7QGH7)            | -1.0/NF | NS/NS   | -1.7/NF |
| Apoptosis antagonizing transcription factor            | ISCW007430<br>(B7PW14)            | NF/NF   | NF/NF   | NF/NF   |
| THAP domain containing, apoptosis associated protein 2 | ISCW024143<br>(B7PCQ7)            | NF/NF   | NF/NF   | NF/NF   |
|                                                        | ISCW024918<br>(B7QIT8)            | NF/NF   | NF/NF   | NF/NF   |
| Apoptosis-promoting RNA-binding protein TIA-1/TIAR     | ISCW016601<br>(B7PBU8)            | NF/NS   | NF/NS   | NF/NF   |
| Apoptosis stimulating of P53                           | ISCW007014<br>(B7PSS5)            | NF/NF   | NF/NF   | NF/NF   |

---

**Janus kinase/signal transducers and activators of transcription (JAK/STAT) pathway**

|                                         |                        |         |       |         |
|-----------------------------------------|------------------------|---------|-------|---------|
| JAK (Hopscotch) tyrosine protein kinase | ISCW016158<br>(B7P4T8) | +2.0/NF | NS/NF | -2.5/NF |
| STAT3                                   | ISCW005692<br>(B7PKW7) | +1.2/NF | NS/NF | -1.1/NF |

|                                                      |                     |         |       |         |
|------------------------------------------------------|---------------------|---------|-------|---------|
| JAK receptor protein tyrosine phosphatase (Domeless) | ISCW016699 (B7PAS3) | +2.1/NF | NS/NF | -0.9/NF |
| PIAS Sumo ligase                                     | ISCW005295 (B7PLL7) | NS/NF   | NS/NF | NS/NF   |
| SOCS box SH2 domain-containing protein               | ISCW019435 (B7PTW4) | -2.2/NF | NS/NF | -1.0/NF |

---

Abbreviations: +, up-regulated/over-represented in infected ticks; -, down-regulated/under-represented in infected ticks; NS, no significant differences between infected and uninfected ticks; NF, transcript/protein not found.
