# Supplementary material for: Systems Biology of Tissue-Specific Response to Anaplasma phagocytophilum Reveals Differentiated Apoptosis in the Tick Vector Ixodes scapularis
Source: PubMed Central journal article supplement (PMC4376793; doi:10.1371/journal.pgen.1005120), 2015-03-27
Supplement: pgen.1005120.s011.pdf [file pgen.1005120.s011.pdf]

Table S5. Genes selected for expression analysis and RNAi.

| <b>Gene ID</b>               | <b>Forward and Reverse Primers for dsRNA synthesis (5' - 3')*</b> | <b>Forward and Reverse Primers for real-time RT-PCR (5' - 3')</b> |
|------------------------------|-------------------------------------------------------------------|-------------------------------------------------------------------|
| ISCW007727                   | Not used for RNAi                                                 | GGCGTCAGGGCTACTGTATT<br>ACAACAAGCTGCGTGAATGC                      |
| ISCW008802                   | Not used for RNAi                                                 | ATGTGGACATTCCTCTGGCC<br>TCTCTCCAGCAGCTCCAGAT                      |
| ISCW019520                   | Not used for RNAi                                                 | TGATGCACCACCAGGGAAAG<br>ACACTGGATGCCAGACTTG                       |
| ISCW015648                   | Not used for RNAi                                                 | CGACTCAAACAGGCTCAGGT<br>TCTCGCTGTTGAACACCTCC                      |
| ISCW023496                   | Not used for RNAi                                                 | CGGAGATCTGCCTGCTCAA<br>GCTCTGCTGTCGACTCTTCA                       |
| ISCW002130                   | Not used for RNAi                                                 | GGAAGATCTGGAGCGTTGGT<br>CTCGGCATTTACCGAGTCGT                      |
| ISCW018935                   | Not used for RNAi                                                 | GAGGACTGCTGCTACGTCAC<br>ACCAGGTTCAAGTTCAGCTC                      |
| ISCW023283                   | Not used for RNAi                                                 | AGCGGCCAACATTCGGGAGG<br>ATGAGCCCCACCTGGCGGAA                      |
| ISCW005928                   | Not used for RNAi                                                 | GCTACCACAAC TAGAAGAAACC<br>TGAAGCAACGTAAGGAGTTT                   |
| ISCW024910                   | Not used for RNAi                                                 | GACACTAGCGAGAACATCCGA<br>ACACTTGGATCGTGACGGC                      |
| ISCW020374                   | Not used for RNAi                                                 | AGGCCAAGGCTGCTTCCAC<br>CGACACGGTGCCCTCGAC                         |
| ISCW021516 (Bcl-2)           | CGTCAACGAGACCGACAAGA<br>TGGCTCAATGAAAAACGCCG                      | TTTGCTCGCATACCGAGGTC<br>TACGACGAGATGCACGCCACA                     |
| ISCW012387<br>(Hexokinase)   | CTCGCCCCTAAGAAACCGTT<br>TGAAACGTATGGCTGCAGGT                      | CATCTGCCTCGCTGAATTGC<br>AACGGTTTCTTAGGGGCGAG                      |
| ISCW000781 (Porin)           | ATGGCTCCTCCGTGCTACG<br>AATTGTTGACCTTCGCCCT                        | GTCGTGAAACTCGACTGCAA<br>CCGTGTTCCACTTCTCCTTC                      |
| ISCW010694 (IAP)             | CAAGGCGGGCTTCTTCTACA<br>GAGGAGGGCTGGTGAAAGTC                      | AACTCCCCTTGAAGATGGC<br>CATGGTCGGAGACACCTGG                        |
| ISCW003039<br>(Caspase)      | AAGACATCGCTCGAGTCACC<br>CCCACGAAAACGTCCGGATA                      | CATCAACGCCTTGTGCTCAG<br>AAGCTGCACTGTCTCGTGAT                      |
| ISCW008740<br>(Cytochrome c) | Not used for RNAi                                                 | AGAGCAGCCATGGTGCAAAT<br>TCTGTGTAGCTGAAGCCTGC                      |

\*All primers contained T7 promoter sequences at the 5'-end (5'-TAATACGACTCACTATAGGGTACT-3' or 5'-TAATACGACTCACTATAGGGAG-3').
